# Supplementary material for: Effects of small-molecule amyloid modulators on a Drosophila model of Parkinson’s disease
Source: PubMed Central journal article supplement (PMC5581160; doi:10.1371/journal.pone.0184117), 2017-09-01
Supplement: pone.0184117.s006.pdf [file pone.0184117.s006.pdf]

| AS VEH   | MEAN VELOCITY (mm/s)             |       |       |       |       |       |
|----------|----------------------------------|-------|-------|-------|-------|-------|
|          | 1                                | 7     | 16    | 21    | 30    | 42    |
| CTRL VEH | 0,259                            | 0,000 | 0,000 | 0,000 | 0,080 | 0,000 |
| AS VEH   | MAXIMUM VELOCITY (mm/s)          |       |       |       |       |       |
|          | 1                                | 7     | 16    | 21    | 30    | 42    |
| CTRL VEH | 0,001                            | 0,002 | 0,021 | 0,003 | 0,166 | 0,399 |
| AS VEH   | TOTAL DURATION (S)               |       |       |       |       |       |
|          | 1                                | 7     | 16    | 21    | 30    | 42    |
| CTRL VEH | 0,172                            | 0,069 | 0,002 | 0,000 | 0,085 | 0,115 |
| AS VEH   | TOTAL TRAJECTORY (mm)            |       |       |       |       |       |
|          | 1                                | 7     | 16    | 21    | 30    | 42    |
| CTRL VEH | 0,493                            | 0,001 | 0,000 | 0,000 | 0,059 | 0,008 |
| AS VEH   | MOTION (%)                       |       |       |       |       |       |
|          | 1                                | 7     | 16    | 21    | 30    | 42    |
| CTRL VEH | 0,506                            | 0,002 | 0,000 | 0,000 | 0,075 | 0,001 |
| AS VEH   | MEAN TRAJECTORY LENGTH (mm)      |       |       |       |       |       |
|          | 1                                | 7     | 16    | 21    | 30    | 42    |
| CTRL VEH | 0,281                            | 0,000 | 0,000 | 0,000 | 0,065 | 0,000 |
| AS VEH   | NUMBER OF TRAJECTORIES           |       |       |       |       |       |
|          | 1                                | 7     | 16    | 21    | 30    | 42    |
| CTRL VEH | 0,917                            | 0,291 | 0,403 | 0,679 | 0,305 | 0,000 |
| AS VEH   | MEAN TRAJECTORY PER EPISODE (mm) |       |       |       |       |       |
|          | 1                                | 7     | 16    | 21    | 30    | 42    |
| CTRL VEH | 0,867                            | 0,012 | 0,002 | 0,000 | 0,042 | 0,000 |
