# Supplementary material for: Effects of small-molecule amyloid modulators on a Drosophila model of Parkinson’s disease
Source: PubMed Central journal article supplement (PMC5581160; doi:10.1371/journal.pone.0184117), 2017-09-01
Supplement: pone.0184117.s007.pdf [file pone.0184117.s007.pdf]

| Pairwise Comparisons  |             |            |      |             |      |             |      |            |      |
|-----------------------|-------------|------------|------|-------------|------|-------------|------|------------|------|
| TREATMENT             |             | AS TG VEH  |      | AS TG FN075 |      | AS TG MS400 |      | AS TG C10  |      |
|                       |             | Chi-Square | Sig. | Chi-Square  | Sig. | Chi-Square  | Sig. | Chi-Square | Sig. |
| Log Rank (Mantel-Cox) | AS TG VEH   |            |      | ,059        | ,807 | ,047        | ,827 | ,441       | ,506 |
|                       | AS TG FN075 | ,059       | ,807 |             |      | ,848        | ,357 | ,460       | ,498 |
|                       | AS TG MS400 | ,047       | ,827 | ,848        | ,357 |             |      | 4,166      | ,041 |
|                       | AS TG C10   | ,441       | ,506 | ,460        | ,498 | 4,166       | ,041 |            |      |
