# Supplementary material for: Effects of small-molecule amyloid modulators on a Drosophila model of Parkinson’s disease
Source: PubMed Central journal article supplement (PMC5581160; doi:10.1371/journal.pone.0184117), 2017-09-01
Supplement: pone.0184117.s008.pdf [file pone.0184117.s008.pdf]

| Pairwise Comparisons  |          |            |      |            |      |            |      |            |      |            |      |
|-----------------------|----------|------------|------|------------|------|------------|------|------------|------|------------|------|
| TREATMENT             |          | AS VEH     |      | CTRL VEH   |      | AS FN075   |      | AS MS400   |      | AS C10     |      |
|                       |          | Chi-Square | Sig. | Chi-Square | Sig. | Chi-Square | Sig. | Chi-Square | Sig. | Chi-Square | Sig. |
| Log Rank (Mantel-Cox) | AS VEH   |            |      | 7,002      | ,008 | 13,703     | ,000 | 18,617     | ,000 | 10,573     | ,001 |
|                       | CTRL VEH | 7,002      | ,008 |            |      | 3,964      | ,046 | 34,526     | ,000 | 34,062     | ,000 |
|                       | AS FN075 | 13,703     | ,000 | 3,964      | ,046 |            |      | 35,673     | ,000 | 36,893     | ,000 |
|                       | AS MS400 | 18,617     | ,000 | 34,526     | ,000 | 35,673     | ,000 |            |      | 4,648      | ,031 |
|                       | AS C10   | 10,573     | ,001 | 34,062     | ,000 | 36,893     | ,000 | 4,648      | ,031 |            |      |
