# Supplementary material for: Effects of small-molecule amyloid modulators on a Drosophila model of Parkinson’s disease
Source: PubMed Central journal article supplement (PMC5581160; doi:10.1371/journal.pone.0184117), 2017-09-01
Supplement: pone.0184117.s010.pdf [file pone.0184117.s010.pdf]

| AS VEH   | MEAN VELOCITY (mm/s)             |       |       |       |       |       |
|----------|----------------------------------|-------|-------|-------|-------|-------|
|          | 1                                | 7     | 16    | 21    | 30    | 42    |
| AS FN075 | 0,005                            | 0,056 | 0,008 | 0,002 | 0,118 | 0,833 |
| AS MS400 | 0,013                            | 0,251 | 0,020 | 0,184 | 0,982 | 0,104 |
| AS C10   | 0,008                            | 0,229 | 0,600 | 0,815 | 0,952 | n/a   |
| CTRL VEH | 0,016                            | 0,692 | 0,977 | 0,975 | 0,678 | n/a   |
| AS VEH   | MAXIMUM VELOCITY (mm/s)          |       |       |       |       |       |
|          | 1                                | 7     | 16    | 21    | 30    | 42    |
| AS FN075 | 0,134                            | 0,488 | 0,523 | 0,130 | 0,283 | 0,012 |
| AS MS400 | 0,019                            | 0,240 | 0,960 | 0,958 | 0,900 | 0,861 |
| AS C10   | 0,011                            | 0,052 | 0,555 | 0,557 | 0,838 | n/a   |
| CTRL VEH | 0,007                            | 0,953 | 0,084 | 0,451 | 0,412 | n/a   |
| AS VEH   | TOTAL DURATION (s)               |       |       |       |       |       |
|          | 1                                | 7     | 16    | 21    | 30    | 42    |
| AS FN075 | 0,451                            | 0,047 | 0,045 | 0,000 | 0,004 | 0,958 |
| AS MS400 | 0,336                            | 0,039 | 0,009 | 0,154 | 0,262 | 0,054 |
| AS C10   | 0,287                            | 0,138 | 0,197 | 0,473 | 0,624 | n/a   |
| CTRL VEH | 0,516                            | 0,671 | 0,568 | 0,371 | 0,619 | n/a   |
| AS VEH   | TOTAL TRAJECTORY (mm)            |       |       |       |       |       |
|          | 1                                | 7     | 16    | 21    | 30    | 42    |
| AS FN075 | 0,684                            | 0,039 | 0,016 | 0,000 | 0,017 | 0,726 |
| AS MS400 | 0,961                            | 0,074 | 0,007 | 0,241 | 0,434 | 0,023 |
| AS C10   | 0,958                            | 0,093 | 0,240 | 0,630 | 0,690 | n/a   |
| CTRL VEH | 0,101                            | 0,735 | 0,685 | 0,574 | 0,818 | n/a   |
| AS VEH   | MOTION (%)                       |       |       |       |       |       |
|          | 1                                | 7     | 16    | 21    | 30    | 42    |
| AS FN075 | 0,009                            | 0,015 | 0,000 | 0,000 | 0,017 | 0,885 |
| AS MS400 | 0,012                            | 0,099 | 0,002 | 0,042 | 0,978 | 0,236 |
| AS C10   | 0,014                            | 0,255 | 0,347 | 0,579 | 0,994 | n/a   |
| CTRL VEH | 0,009                            | 0,440 | 0,894 | 0,987 | 0,493 | n/a   |
| AS VEH   | MEAN TRAJECTORY LENGTH (mm)      |       |       |       |       |       |
|          | 1                                | 7     | 16    | 21    | 30    | 42    |
| AS FN075 | 0,013                            | 0,044 | 0,004 | 0,001 | 0,078 | 0,854 |
| AS MS400 | 0,011                            | 0,221 | 0,014 | 0,142 | 0,970 | 0,095 |
| AS C10   | 0,008                            | 0,234 | 0,565 | 0,790 | 0,951 | n/a   |
| CTRL VEH | 0,012                            | 0,649 | 0,949 | 0,985 | 0,578 | n/a   |
| AS VEH   | NUMBER OF TRAJECTORIES           |       |       |       |       |       |
|          | 1                                | 7     | 16    | 21    | 30    | 42    |
| AS FN075 | 0,198                            | 0,050 | 0,001 | 0,725 | 0,623 | 0,000 |
| AS MS400 | 0,954                            | 0,724 | 0,389 | 0,828 | 0,520 | 0,035 |
| AS C10   | 0,883                            | 0,067 | 0,901 | 0,170 | 0,075 | n/a   |
| CTRL VEH | 0,756                            | 0,199 | 0,394 | 0,605 | 0,025 | n/a   |
| AS VEH   | MEAN TRAJECTORY PER EPISODE (mm) |       |       |       |       |       |
|          | 1                                | 7     | 16    | 21    | 30    | 42    |
| AS FN075 | 0,279                            | 0,001 | 0,000 | 0,021 | 0,045 | 0,736 |
| AS MS400 | 0,912                            | 0,127 | 0,013 | 0,049 | 0,687 | 0,047 |
| AS C10   | 0,837                            | 0,468 | 0,542 | 0,983 | 0,944 | n/a   |
| CTRL VEH | 0,495                            | 0,479 | 0,911 | 0,954 | 0,263 | n/a   |
