# Supplementary material for: Effects of small-molecule amyloid modulators on a Drosophila model of Parkinson’s disease
Source: PubMed Central journal article supplement (PMC5581160; doi:10.1371/journal.pone.0184117), 2017-09-01
Supplement: pone.0184117.s011.pdf [file pone.0184117.s011.pdf]

| CTRL TG VEH   | MEAN VELOCITY (mm/s)                    |       |       |       |       |      |
|---------------|-----------------------------------------|-------|-------|-------|-------|------|
|               | 1                                       | 7     | 16    | 21    | 30    | 42   |
| CTRL TG FN075 | 0,185                                   | 0,661 | 0,981 | 0,115 | 0,239 | n.d. |
| CTRL TG MS400 | 0,123                                   | 0,934 | 0,237 | 0,075 | 0,681 | n.d. |
| CTRL TG C10   | 0,002                                   | 0,421 | 0,860 | 0,005 | 0,707 | n.d. |
| CTRL TG VEH   | MAXIMUM VELOCITY (mm/s)                 |       |       |       |       |      |
|               | 1                                       | 7     | 16    | 21    | 30    | 42   |
| CTRL TG FN075 | 0,528                                   | 0,476 | 0,701 | 0,066 | 0,077 | n.d. |
| CTRL TG MS400 | 0,971                                   | 0,105 | 0,409 | 0,340 | 0,891 | n.d. |
| CTRL TG C10   | 0,328                                   | 0,803 | 0,901 | 0,449 | 0,460 | n.d. |
| CTRL TG VEH   | TOTAL DURATION (s)                      |       |       |       |       |      |
|               | 1                                       | 7     | 16    | 21    | 30    | 42   |
| CTRL TG FN075 | 0,071                                   | 0,345 | 0,396 | 0,859 | 0,363 | n.d. |
| CTRL TG MS400 | 0,084                                   | 0,173 | 0,909 | 0,581 | 0,220 | n.d. |
| CTRL TG C10   | 0,005                                   | 0,595 | 0,781 | 0,921 | 0,578 | n.d. |
| CTRL TG VEH   | TOTAL TRAJECTORY (mm)                   |       |       |       |       |      |
|               | 1                                       | 7     | 16    | 21    | 30    | 42   |
| CTRL TG FN075 | 0,165                                   | 0,447 | 0,553 | 0,780 | 0,252 | n.d. |
| CTRL TG MS400 | 0,204                                   | 0,403 | 0,896 | 0,235 | 0,390 | n.d. |
| CTRL TG C10   | 0,035                                   | 0,310 | 0,899 | 0,122 | 0,926 | n.d. |
| CTRL TG VEH   | MOTION (%)                              |       |       |       |       |      |
|               | 1                                       | 7     | 16    | 21    | 30    | 42   |
| CTRL TG FN075 | 0,969                                   | 0,322 | 0,636 | 0,308 | 0,284 | n.d. |
| CTRL TG MS400 | 0,764                                   | 0,295 | 0,192 | 0,118 | 0,278 | n.d. |
| CTRL TG C10   | 0,318                                   | 0,702 | 0,437 | 0,053 | 0,929 | n.d. |
| CTRL TG VEH   | MEAN TRAJECTORY LENGTH (mm)             |       |       |       |       |      |
|               | 1                                       | 7     | 16    | 21    | 30    | 42   |
| CTRL TG FN075 | 0,214                                   | 0,627 | 0,962 | 0,138 | 0,238 | n.d. |
| CTRL TG MS400 | 0,164                                   | 0,996 | 0,238 | 0,078 | 0,627 | n.d. |
| CTRL TG C10   | 0,005                                   | 0,474 | 0,951 | 0,005 | 0,728 | n.d. |
| CTRL TG VEH   | NUMBER OF TRAJECTORIES                  |       |       |       |       |      |
|               | 1                                       | 7     | 16    | 21    | 30    | 42   |
| CTRL TG FN075 | 0,045                                   | 0,642 | 0,792 | 0,138 | 0,909 | n.d. |
| CTRL TG MS400 | 0,014                                   | 0,229 | 0,694 | 0,078 | 0,471 | n.d. |
| CTRL TG C10   | 0,001                                   | 0,467 | 0,428 | 0,465 | 0,649 | n.d. |
| CTRL TG VEH   | MEAN TRAJECTORY LENGTH PER EPISODE (mm) |       |       |       |       |      |
|               | 1                                       | 7     | 16    | 21    | 30    | 42   |
| CTRL TG FN075 | 0,527                                   | 0,906 | 0,763 | 0,595 | 0,285 | n.d. |
| CTRL TG MS400 | 0,090                                   | 0,587 | 0,673 | 0,448 | 0,808 | n.d. |
| CTRL TG C10   | 0,001                                   | 0,860 | 0,643 | 0,059 | 0,802 | n.d. |
