# Supplementary material for: Effects of small-molecule amyloid modulators on a Drosophila model of Parkinson’s disease
Source: PubMed Central journal article supplement (PMC5581160; doi:10.1371/journal.pone.0184117), 2017-09-01
Supplement: pone.0184117.s013.pdf [file pone.0184117.s013.pdf]

| AS VEH  | MEAN VELOCITY (mm/s)             |       |       |       |       |
|---------|----------------------------------|-------|-------|-------|-------|
|         | 4                                | 8     | 15    | 22    | 29    |
| AS DOPA | 0,008                            | 0,114 | 0,004 | 0,410 | 0,000 |
| AS VEH  | MAXIMUM VELOCITY (mm/s)          |       |       |       |       |
|         | 4                                | 8     | 15    | 22    | 29    |
| AS DOPA | 0,138                            | 0,892 | 0,071 | 0,300 | 0,010 |
| AS VEH  | TOTAL DURATION (S)               |       |       |       |       |
|         | 4                                | 8     | 15    | 22    | 29    |
| AS DOPA | 0,263                            | 0,317 | 0,228 | 0,071 | 0,634 |
| AS VEH  | TOTAL TRAJECTORY (mm)            |       |       |       |       |
|         | 4                                | 8     | 15    | 22    | 29    |
| AS DOPA | 0,466                            | 0,578 | 0,951 | 0,234 | 0,509 |
| AS VEH  | MOTION (%)                       |       |       |       |       |
|         | 4                                | 8     | 15    | 22    | 29    |
| AS DOPA | 0,002                            | 0,022 | 0,011 | 0,478 | 0,000 |
| AS VEH  | MEAN TRAJECTORY LENGTH (mm)      |       |       |       |       |
|         | 4                                | 8     | 15    | 22    | 29    |
| AS DOPA | 0,005                            | 0,081 | 0,004 | 0,409 | 0,000 |
| AS VEH  | NUMBER OF TRAJECTORIES           |       |       |       |       |
|         | 4                                | 8     | 15    | 22    | 29    |
| AS DOPA | 0,003                            | 0,280 | 0,195 | 0,139 | 0,008 |
| AS VEH  | MEAN TRAJECTORY PER EPISODE (mm) |       |       |       |       |
|         | 4                                | 8     | 15    | 22    | 29    |
| AS DOPA | 0,000                            | 0,511 | 0,068 | 0,565 | 0,000 |
