# Supplementary material for: Effects of small-molecule amyloid modulators on a Drosophila model of Parkinson’s disease
Source: PubMed Central journal article supplement (PMC5581160; doi:10.1371/journal.pone.0184117), 2017-09-01
Supplement: pone.0184117.s014.pdf [file pone.0184117.s014.pdf]

| Pairwise Comparisons  |          |            |      |
|-----------------------|----------|------------|------|
| TREATMENT             |          | AS DOPA    |      |
|                       |          | Chi-Square | Sig. |
| Log Rank (Mantel-Cox) | AS VEH   | 7,714      | ,005 |
|                       | AS FN075 | 0,303      | ,582 |
|                       | AS MS400 | 32,628     | ,000 |
|                       | AS C10   | 27,538     | ,000 |
|                       | CTRL VEH | 0,738      | ,390 |
